# Supplementary material for: Quaking-5 suppresses aggressiveness of lung cancer cells through inhibiting β-catenin signaling pathway
Source: PubMed Central journal article supplement (PMC5669880; doi:10.18632/oncotarget.19066), 2017-07-07
Supplement: oncotarget-08-82174-s001.pdf [file oncotarget-08-82174-s001.pdf]

# Quaking-5 suppresses aggressiveness of lung cancer cells through inhibiting $\beta$ -catenin signaling pathway

## SUPPLEMENTARY MATERIALS

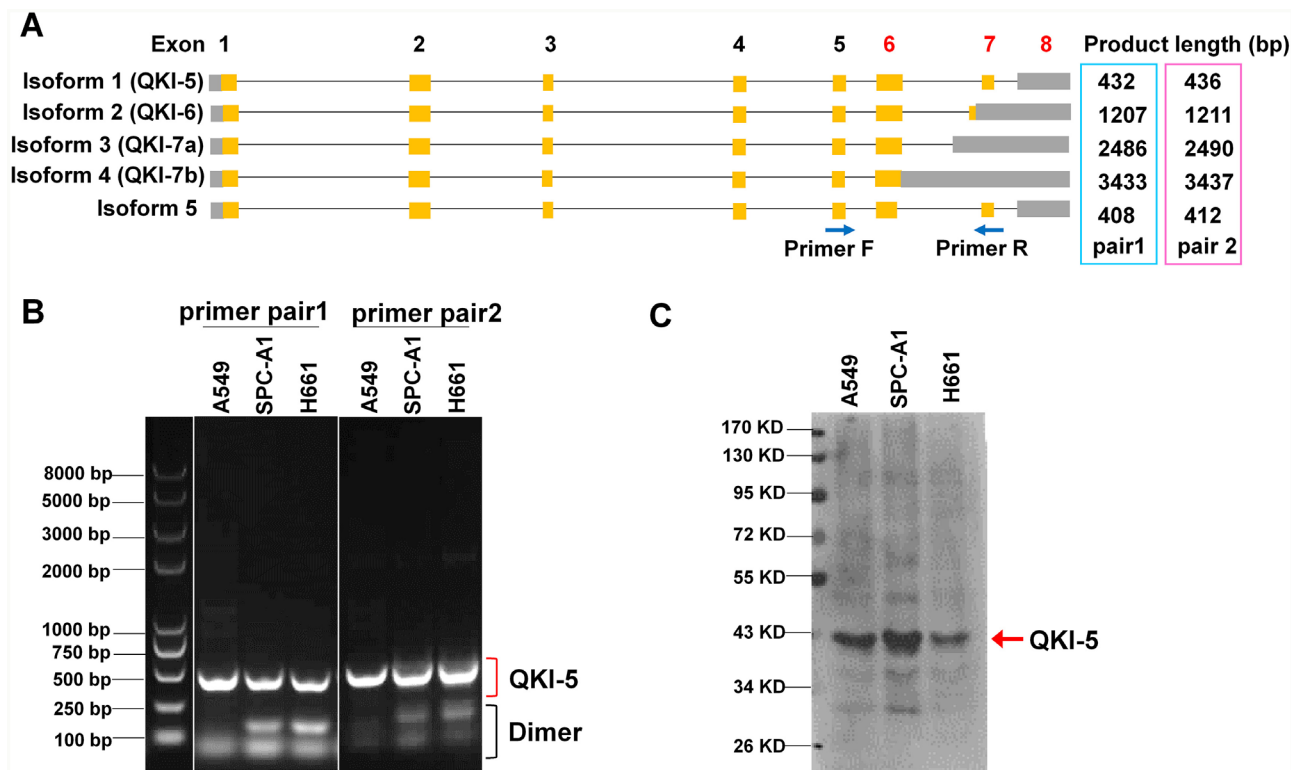

**Supplementary Figure 1: QKI-5 is the dominant isoform of QKIs expressed in LC cells.** (A) Schematic representation of the exon organization of five *QKI* isoforms generated by alternative splicing of exon6-exon8 annotated by NCBI. Gray boxes indicate 5' or 3' untranslated regions. Two pairs of RT-PCR primers flanking exons 6 and 7 (blue arrows) theoretically produce five splicing isoforms with respective length. (B) *QKI* mRNA splicing pattern in LC cell lines (A549, SPC-A1, H661) analyzed by RT-PCR using two primer pairs (blue arrows in A). Gel electrophoresis showed that *QKI-5* was the dominant isoform. (C) Western blotting detection of *QKI* protein expression in the indicated LC cells. The results showed that *QKI-5* was the dominant isoform.

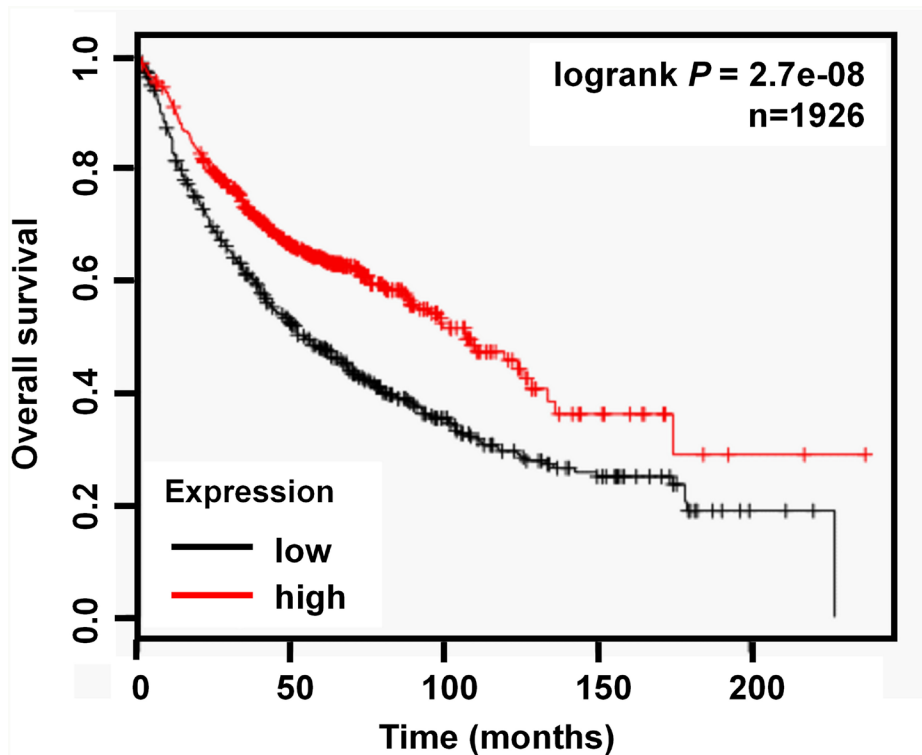

**Supplementary Figure 2: QKI mRNA expression correlates with the prognosis of LC patients.** Kaplan-Meier analysis of the correlation between the level of *QKI* mRNA and overall survival of 1926 LC patients from the Kaplan Meier plotter (<http://www.kmplot.com>).

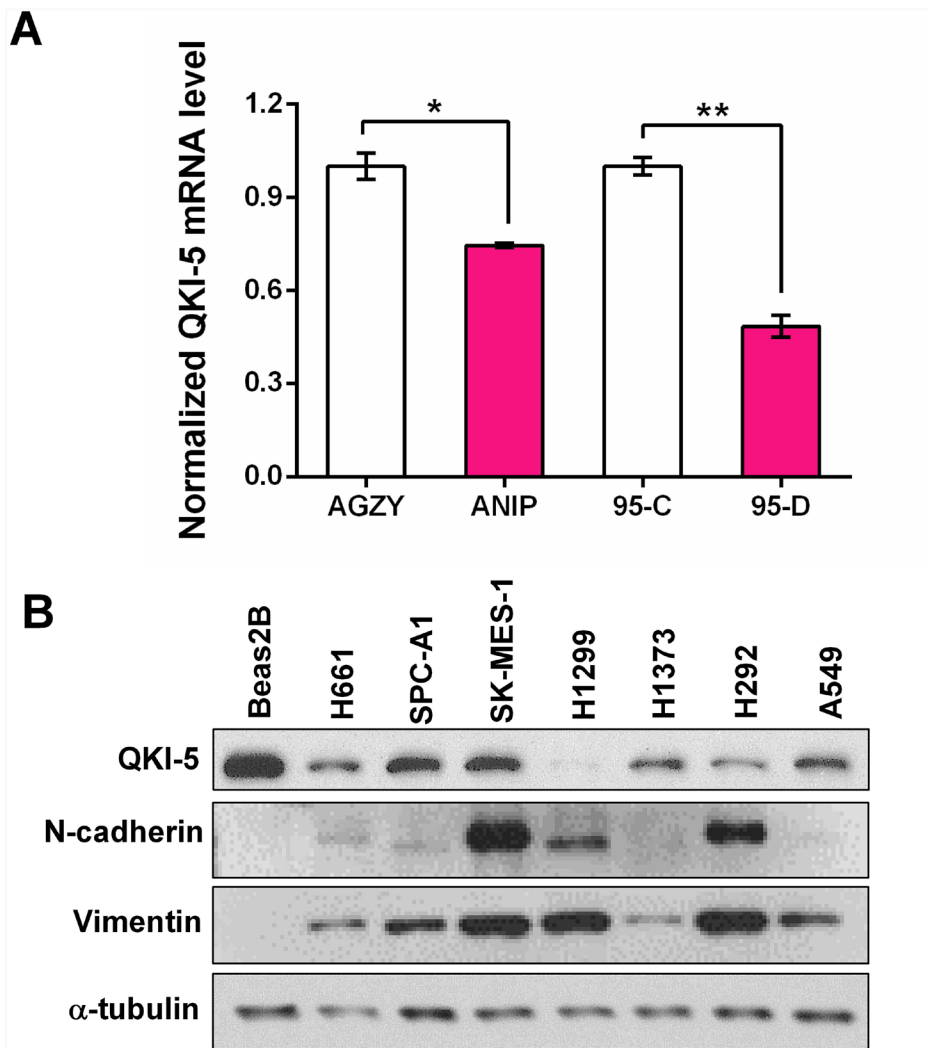

**Supplementary Figure 3: Expression of QKI-5 is decreased in LC cell lines.** (A) *QKI-5* mRNA expression in two pairs of LC cell lines with different metastatic potentials (AGZY vs ANIP, 95C vs 95D). The data are presented as the mean  $\pm$  SD. \* $P < 0.05$ , \*\* $P < 0.01$ . (B) Western blotting analyses of *QKI-5* and mesenchymal markers (N-cadherin, Vimentin) expressions in a panel of LC cell lines and the bronchial epithelial cell (Beas2B).  $\alpha$ -tubulin was used as the loading control.

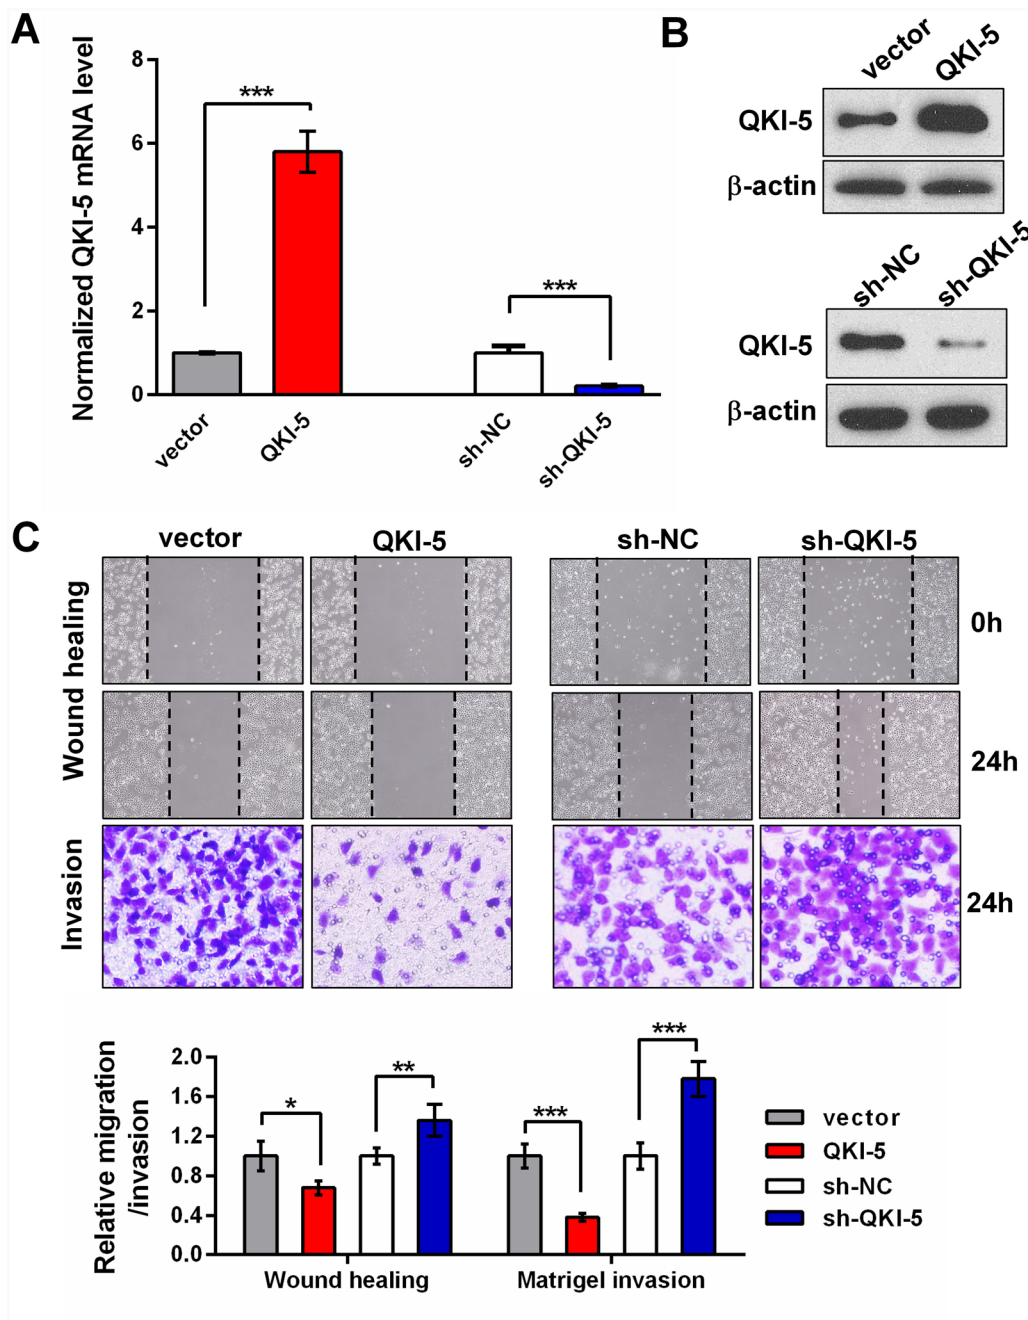

**Supplementary Figure 4: The inhibitory effects of QKI-5 on the migration and invasion of SPC-A1 cells.** (A and B) Detections of qRT-PCR (A) and Western blotting (B) of QKI-5 overexpression and knockdown efficiencies in stable SPC-A1 subcell lines constructed with the indicated viruses or plasmids. The *QKI-5* mRNA level was normalized against *GAPDH*. The ratios of *QKI-5/GAPDH* in the vector and sh-NC groups were arbitrarily set to 1.0. (C) Migration and invasion abilities of the indicated SPC-A1 subcell lines assessed by wound-healing and transwell assays. All the experiments were performed at least in triplicate and the data in A and C are presented as the mean  $\pm$  SD. \* $P < 0.05$ , \*\* $P < 0.01$ , \*\*\* $P < 0.001$ .

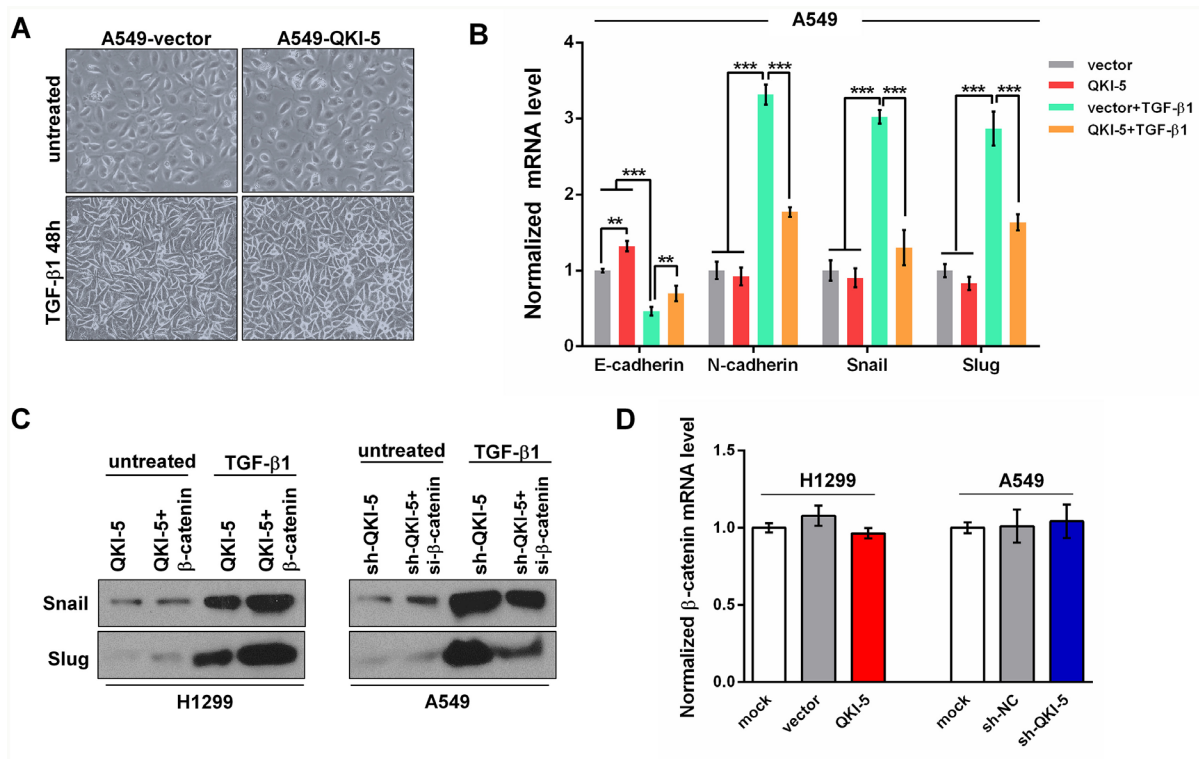

**Supplementary Figure 5: QKI-5 overexpression inhibits the TGF-β1-induced EMT of LC cells via interdicting β-catenin signaling pathway.** (A) Representative images of A549-vector (control) and A549-QKI-5 (QKI-5-overexpressing) cells untreated or incubated with TGF-β1 (5 ng/mL) for 48 h (×200). (B) mRNA levels of *E-cadherin*, *N-cadherin*, *Snail* and *Slug* in the indicated cells incubated with TGF-β1 or untreated in DMEM for 72 h. (C) Protein levels of Snail and Slug determined by Western blotting in the indicated cells. (D) β-catenin mRNA level in the indicated cells; mock = blank control, sh-NC = Scr control, sh-QKI-5 = QKI-5 silence with shRNA. The mRNAs were detected by qRT-PCR and normalized against *GAPDH*. The ratios of the above mRNAs to *GAPDH* mRNA in mock cells were arbitrarily set to 1.0 and the data in B and D are presented as the mean ± SD. \*\**P*<0.01, \*\*\**P*<0.001.

**Supplementary Table 1: Clinical characteristics of all tested tissue samples**

See Supplementary File 1

Supplementary Table 2: Sequences of RT-PCR and MSP primers

| Name                         | Sequences                           |
|------------------------------|-------------------------------------|
| <b>RT-PCR primers</b>        |                                     |
| QKI exon5-Forward-1          | 5'-GGAGAAGACAGCCTGAAGAAGA-3'        |
| QKI exon7-Reverse-1          | 5'-GTAAGGATGGACACGCATATCG-3'        |
| QKI exon5-Forward-2          | 5'-AAGGAGAAGACAGCCTGAAGAA-3'        |
| QKI exon7-Reverse-2          | 5'- TGGTAAGGATGGACACGCATAT-3'       |
| $\beta$ -catenin RIP-Forward | 5'-CAGCTGTATTGTCTGAACTTGC-3'        |
| $\beta$ -catenin RIP-Reverse | 5'-CACTTCTTGAGTCACTCCCAAA-3'        |
| <b>MSP primers</b>           |                                     |
| QKI5 MSP-M-Forward           | 5'-TAATAAGATCGTTTTTTTAGAGGCG-3'     |
| QKI5 MSP-M-Reverse           | 5'- CCGTAACTTCTTTTCGATATTCGTA-3'    |
| QKI5 MSP-U-Forward           | 5'- GGTGTAATAAGATTGTTTTTTTAGAGGT-3' |
| QKI5 MSP-U-Reverse           | 5'- CCATAACTTCTTTCAATATTCATA-3'     |

Supplementary Table 3: Sequences of qRT-PCR primers

| Name                     | Sequences                      |
|--------------------------|--------------------------------|
| QKI-5-Forward            | 5'-AGCTGCCCTGCGTACTCCTA-3'     |
| QKI-5-Reverse            | 5'-TGGGTGAGGAGTTCCGTTTG-3'     |
| $\beta$ -actin-Forward   | 5'-GATCATTGCTCCTCCTGAGC-3'     |
| $\beta$ -actin-Reverse   | 5'-ACTCCTGCTTGCTGATCCAC-3'     |
| E-cadherin-Forward       | 5'-TTCCCTCGACACCCGATTC-3'      |
| E-cadherin-Reverse       | 5'-GTCCCAGGCGTAGACCAAGA-3'     |
| N-cadherin-Forward       | 5'-CCCCTTCACCCAACATGTTT-3'     |
| N-cadherin-Reverse       | 5'-GTGGGATTGCCTTCCATGTC-3'     |
| Vimentin-Forward         | 5'-GAACGCCAGATGCGTGAAAT-3'     |
| Vimentin-Reverse         | 5'-CAGGCGGCCAATAGTGTCTT-3'     |
| Snail-Forward            | 5'-ACCCCAATCGGAAGCCTAAC-3'     |
| Snail-Reverse            | 5'-CGTAGGGCTGCTGGAAGGTA-3'     |
| GAPDH-Forward            | 5'-CCACCCATGGCAAATCCATGGCA-3'  |
| GAPDH-Reverse            | 5'-TCTAGACGGCAGGTCAGGTCCACC-3' |
| $\beta$ -catenin-Forward | 5'-GGCTGGTGACAGGGAAGACAT-3'    |
| $\beta$ -catenin-Reverse | 5'-TTCTGGGCCATCTCTGCTTCT-3'    |



Supplementary Table 4: Sequences of QKI-5 cloning primers

| Name                       | Sequences                            |
|----------------------------|--------------------------------------|
| pcDNA3.1-HindIII-Forward   | 5'-CCCAAGCTTATGGTCGGGGAAATGGAAACG-3' |
| pcDNA3.1-BamHI-Reverse     | 5'-CGCGGATCCTTAGTTGCCGGTGGCGGCT-3'   |
| pCMV-tag2b-BamHI-Forward   | 5'-CGCGGATCCATGGTCGGGGAAATGGAAAC-3'  |
| pCMV-tag2b-HindIII-Reverse | 5'-CCCAAGCTTTTAGTTGCCGGTGGCGGCT-3'   |
| pMSCV-puro-BglII-Forward   | 5'-GGAAGATCTATGGTCGGGGAAATGGAAACG-3' |
| pMSCV-puro-EcoRI-Reverse   | 5'-CCGGAATTCTTAGTTGCCGGTGGCGGCT-3'   |

Supplementary Table 5: Sequences of shRNAs

| Name               | Sequences                                                            |
|--------------------|----------------------------------------------------------------------|
| sh-NC-Sense        | 5'-ccggTTCCTGGAACAATTGCTTTTACTCGAGTAAAAG<br>CAATTGTTCCAGGAATTTTTg-3' |
| sh-NC-Antisense    | 5'-aattcAAAAATTCCTGGAACAATTGCTTTTACTCGAGT<br>AAAAGCAATTGTTCCAGGAA-3' |
| sh-QKI-5-Sense     | 5'-ccggAAGCACCTACAGAGATGCCAACTCGAGTTGGCA<br>TCTCTGTAGGTGCTTTTTTTg-3' |
| sh-QKI-5-Antisense | 5'-aattcAAAAAAGCACCTACAGAGATGCCAACTCGAGT<br>TGGCATCTCTGTAGGTGCTT-3'  |

Supplementary Table 6: Sequences of siRNAs

| Name                           | Sequences                     |
|--------------------------------|-------------------------------|
| si- $\beta$ -catenin-Sense     | 5'-CCCACUAAUGUCCAGCGUUDTdT-3' |
| si- $\beta$ -catenin-Antisense | 5'-AACGCUGGACAUUGUGGGAdTdT-3' |
| si-NC-Sense                    | 5'-GGUGGAACAAUUGCUUUUAdTdT-3' |
| si-NC-Antisense                | 5'-UAAAAGCAAUUGUCCACCCdTdT-3' |
